# Supplementary material for: Aronia melanocarpa Flavonol Extract—Antiradical and Immunomodulating Activities Analysis
Source: MDPI journal article supplement (doi:10.3390/plants12162976), 2023-08-17
Supplement: s1 [file s1]

**Figure S1:** HPLC chromatograms of fractions. (A) Fraction 4; (B) fractions 6-8; (C) fraction 10; (D) fraction 12; (E) fraction 14; (F) fractions 16-17; (G) fractions 20-22; (H) fraction 24.

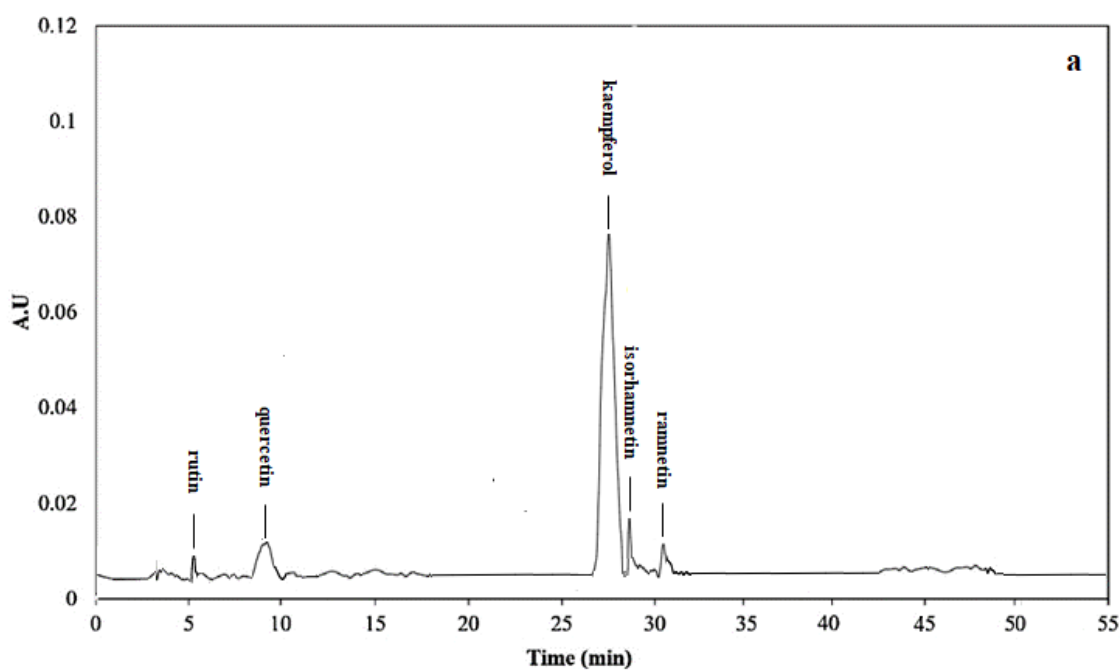

(A)

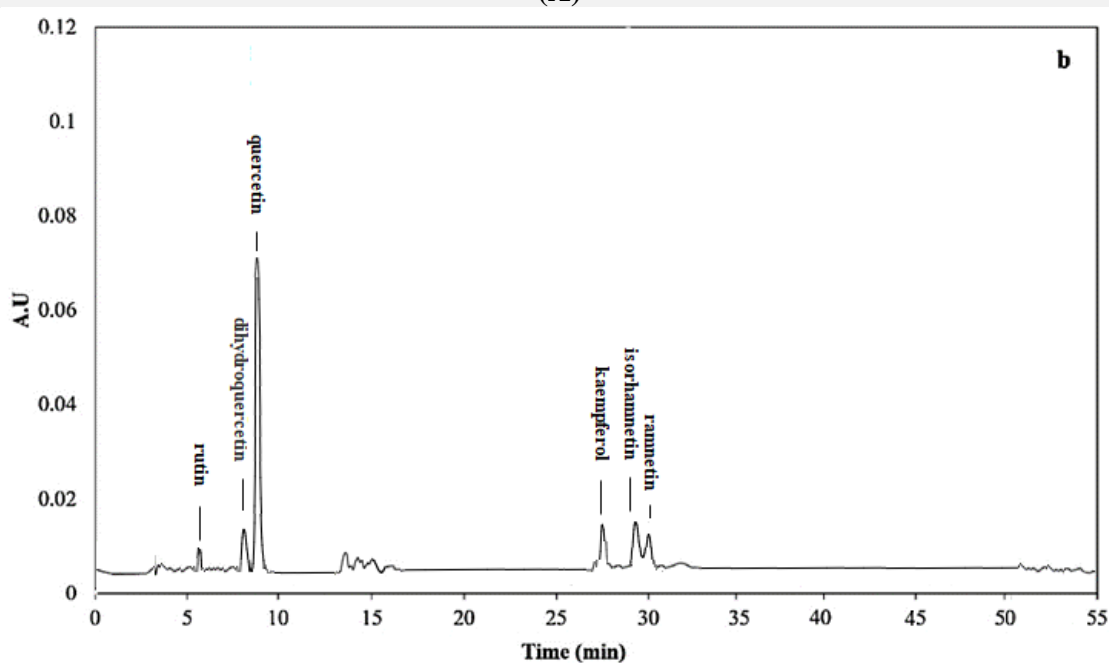

(B)

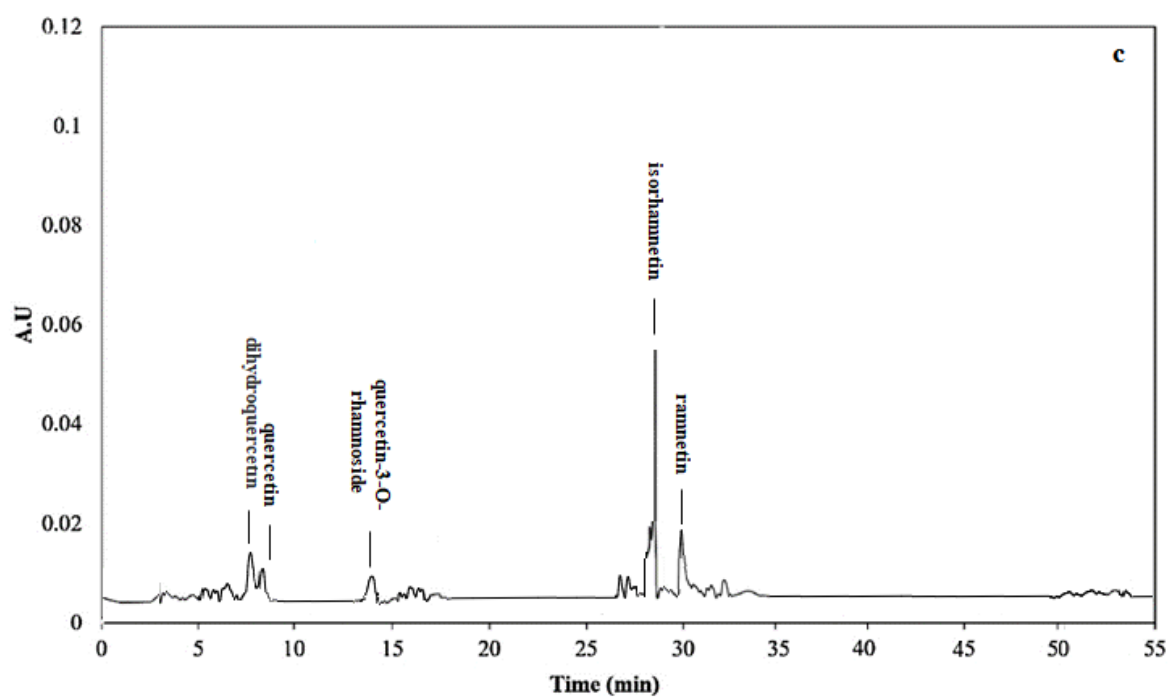

(C)

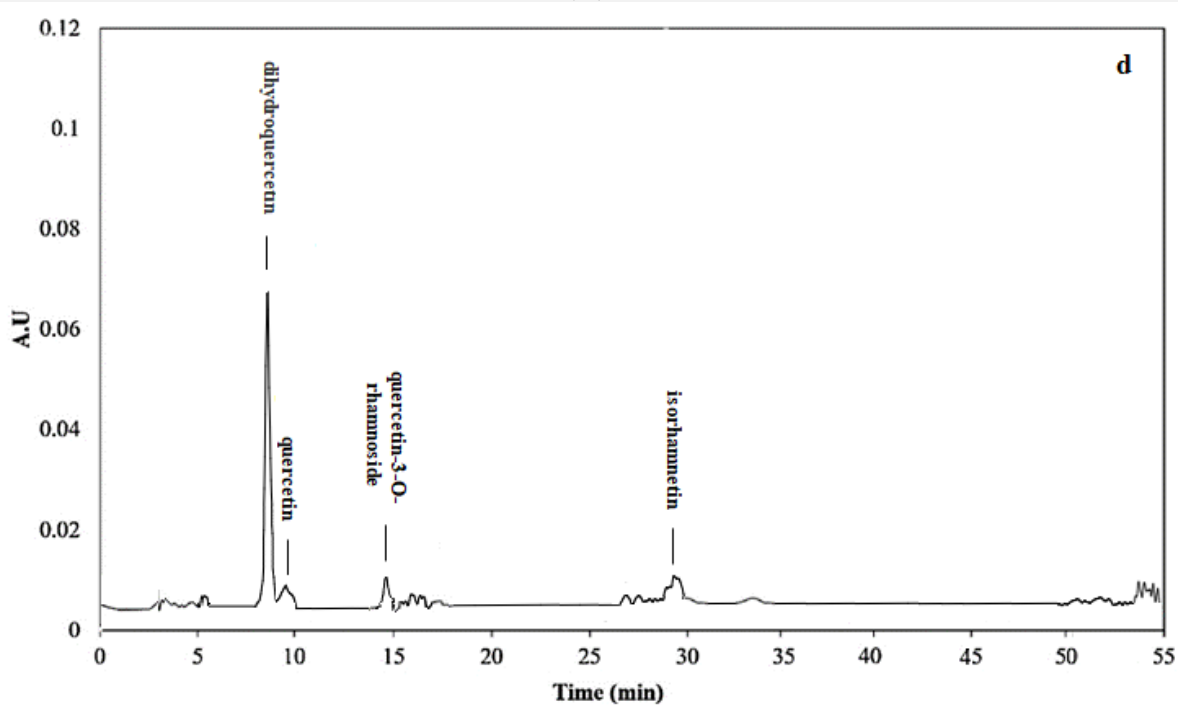

(D)

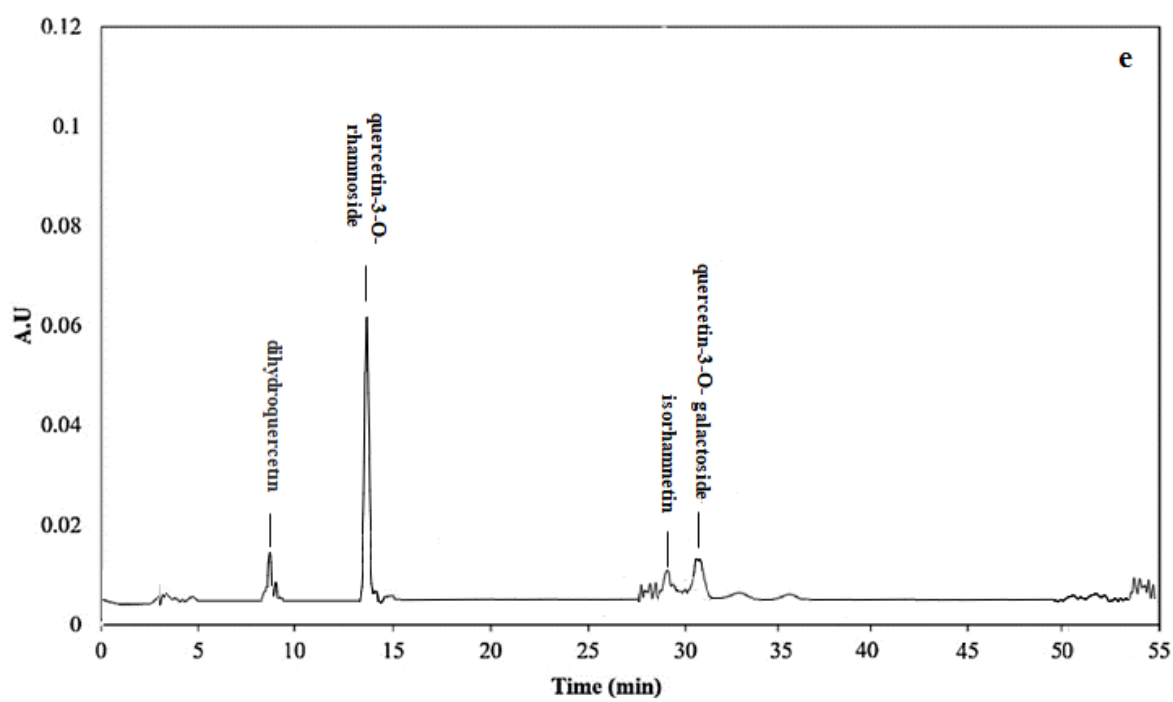

(E)

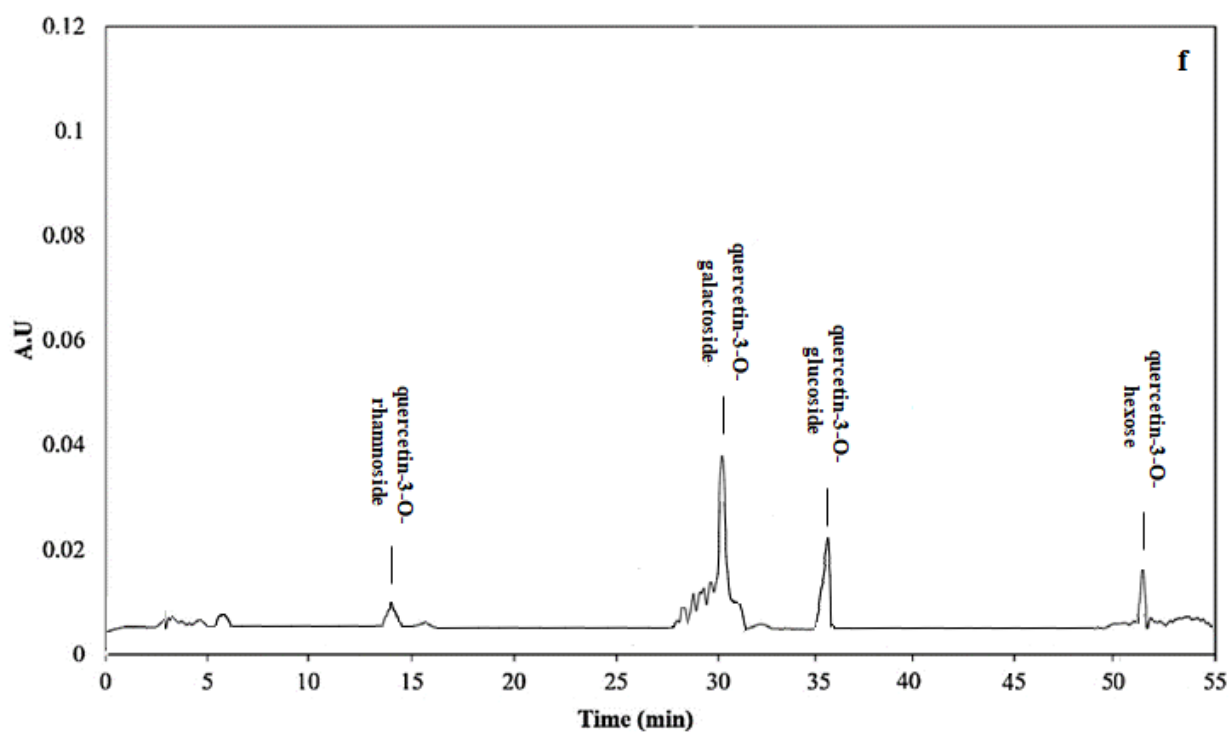

(F)

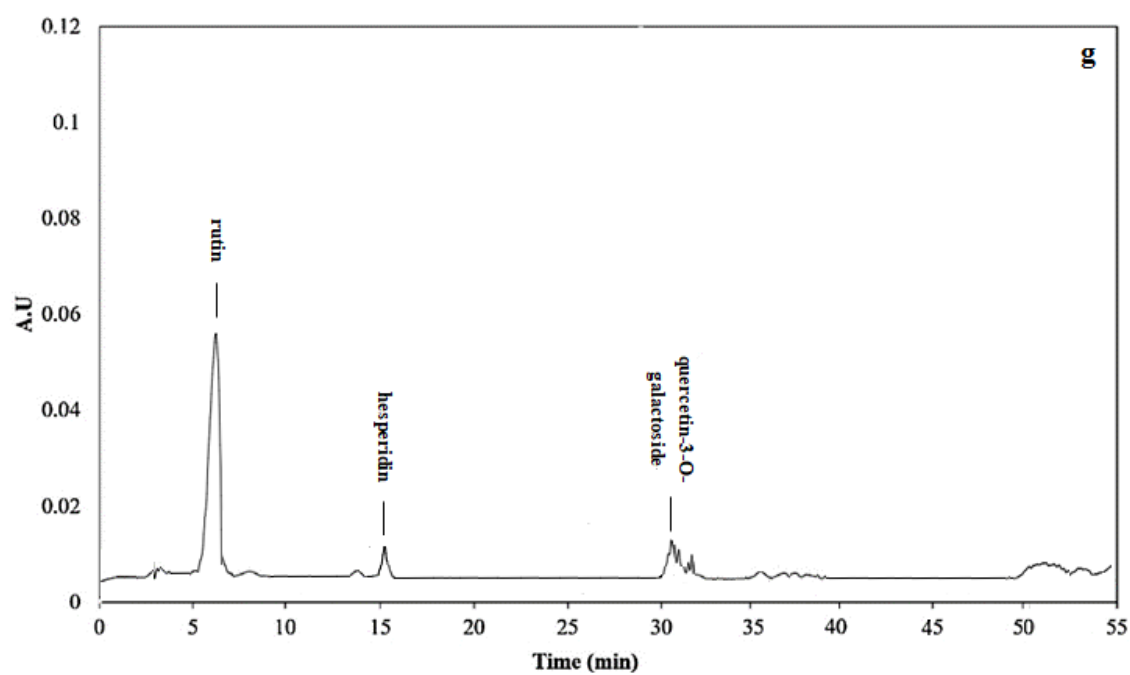

(G)

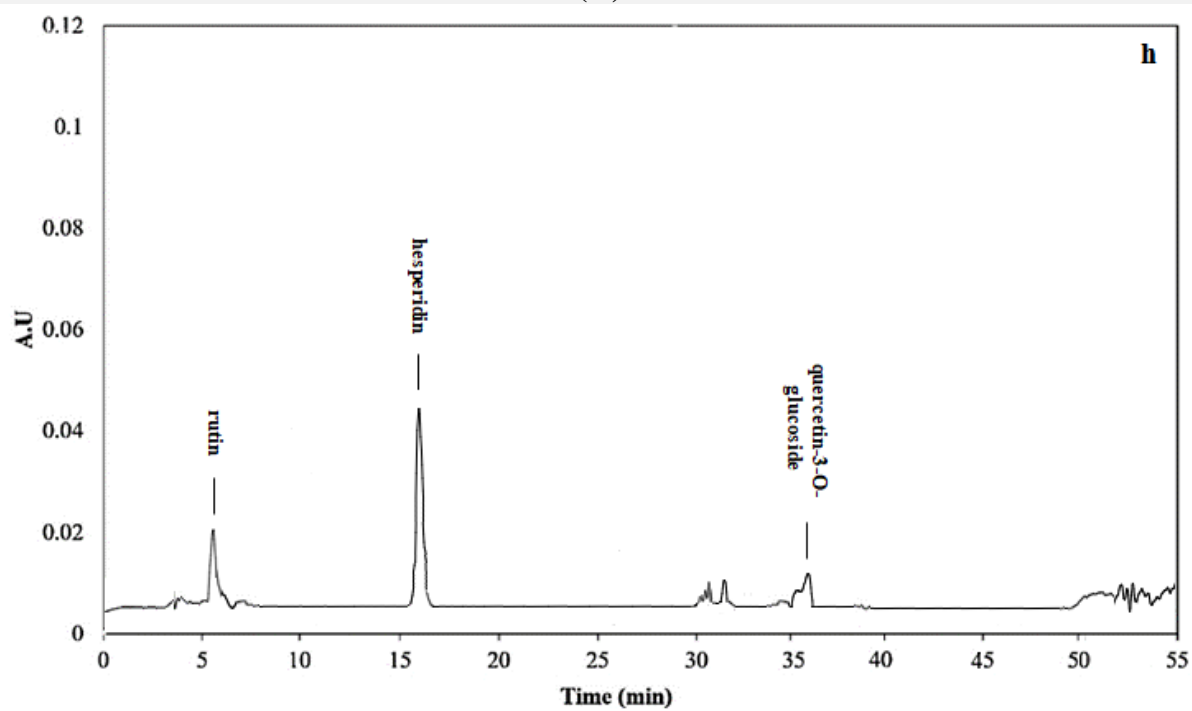

(H)

**Figure S2:** Electrospray ionization (ESI) mass spectra of flavonol fractions. (A) Fraction 4; (B) fractions 6-8; (C) fraction 10; (D) fraction 12; (E) fraction 14; (F) fractions 16-17; (G) fractions 20-22; (H) fraction 24.

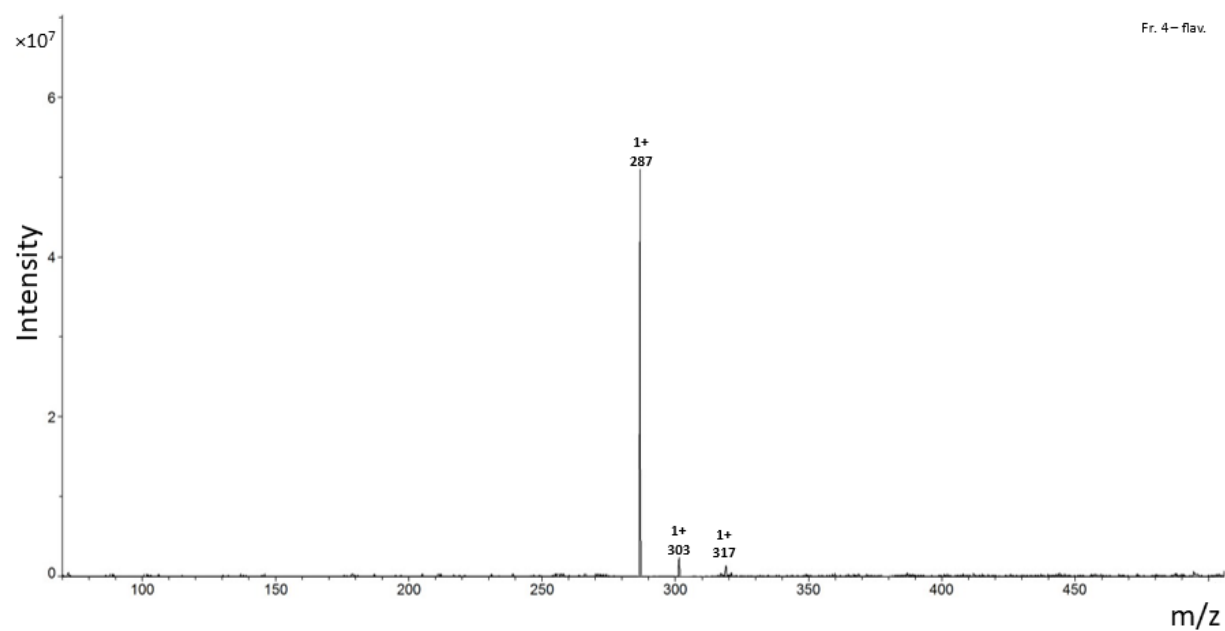

(A)

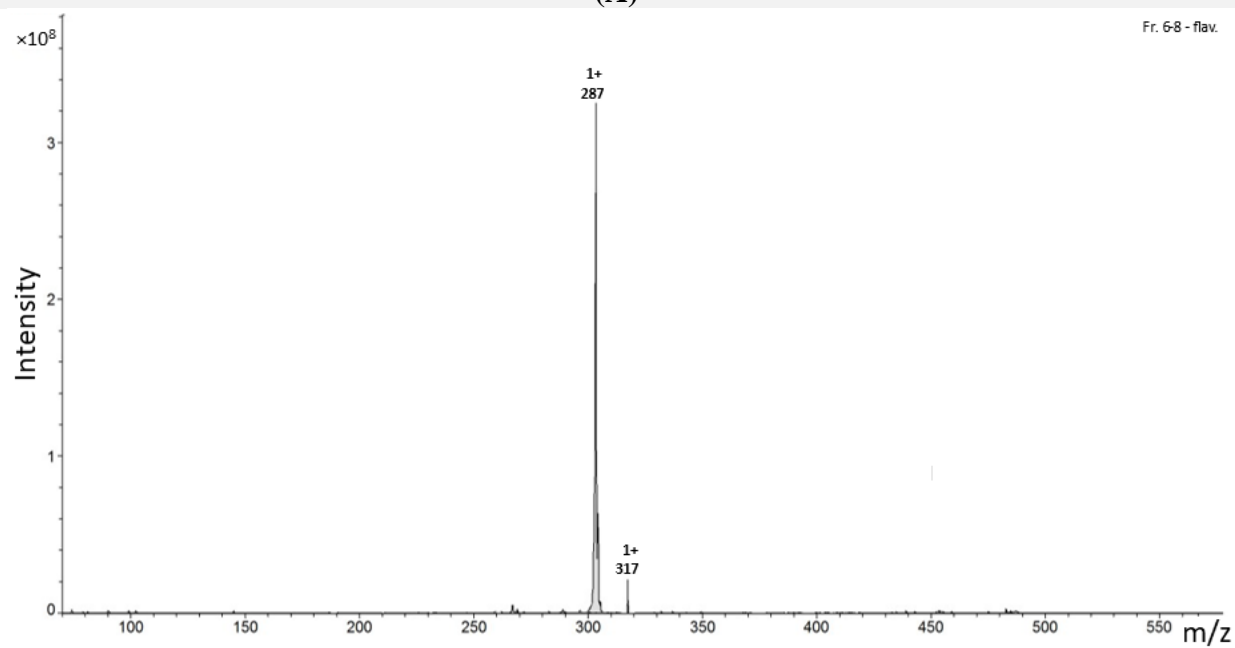

(B)

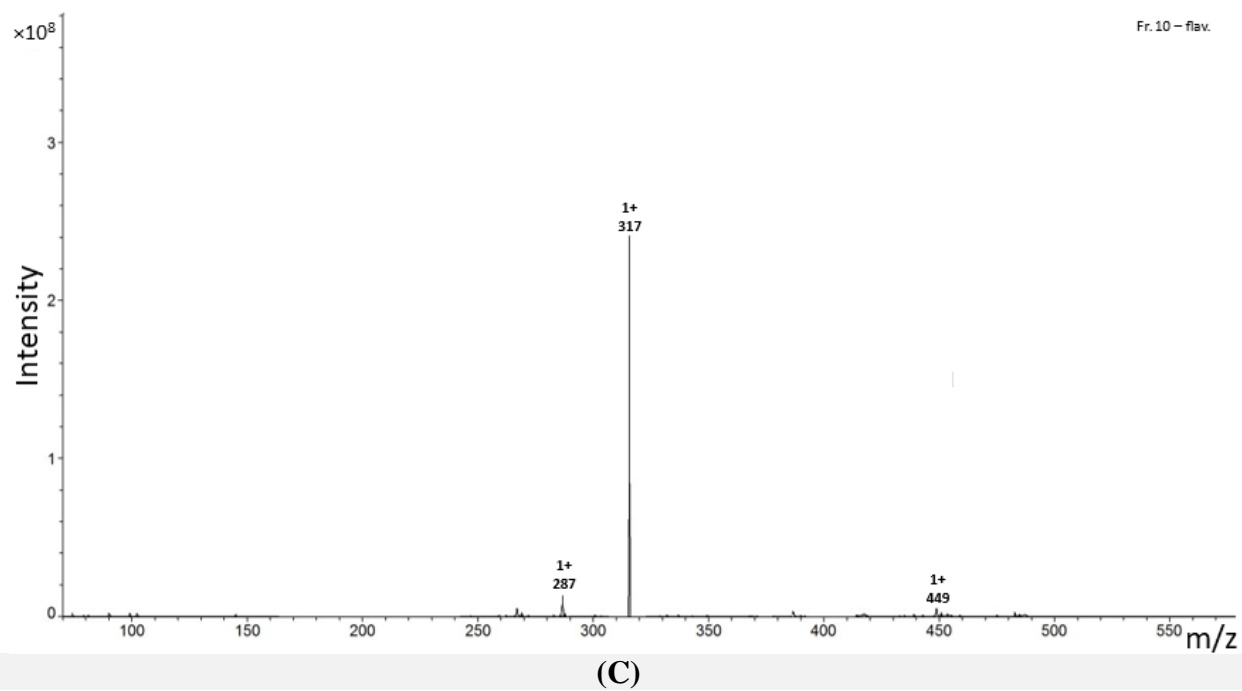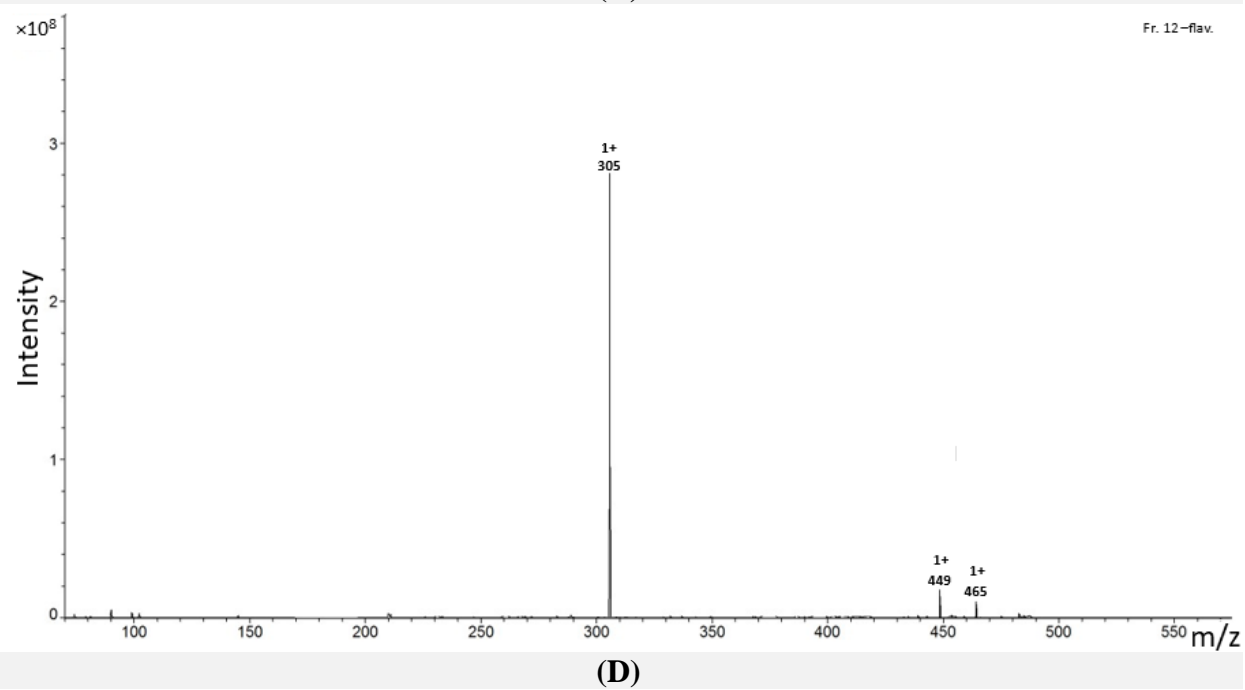

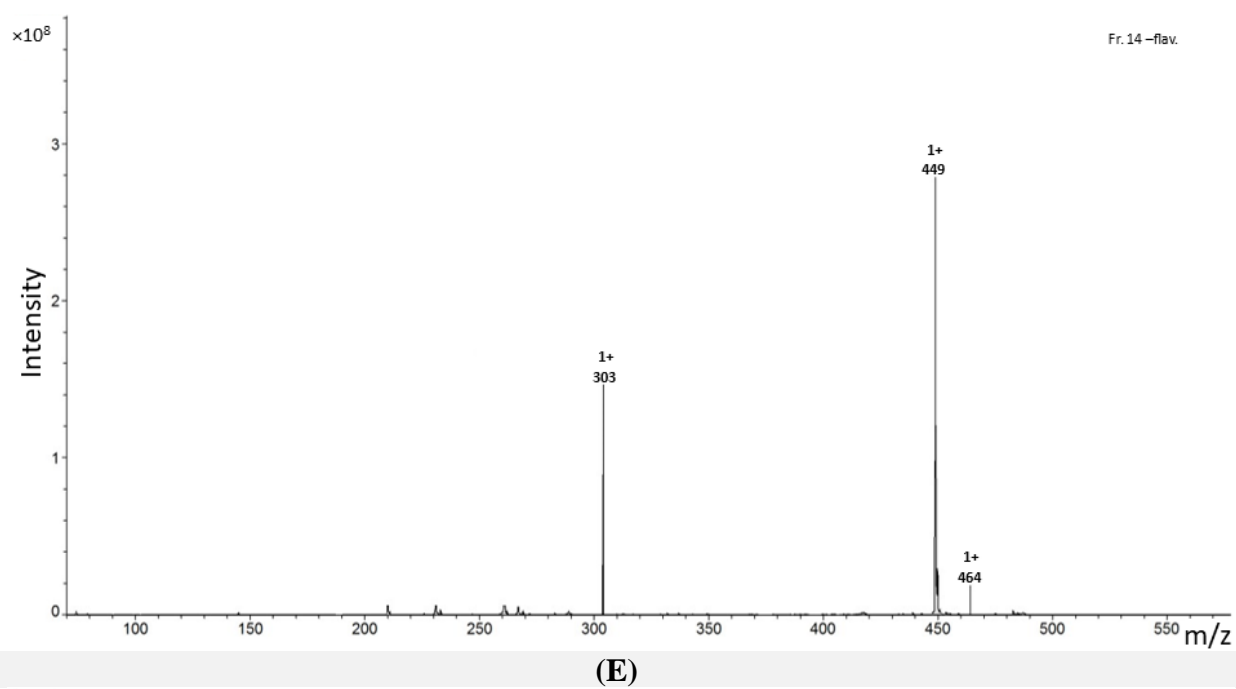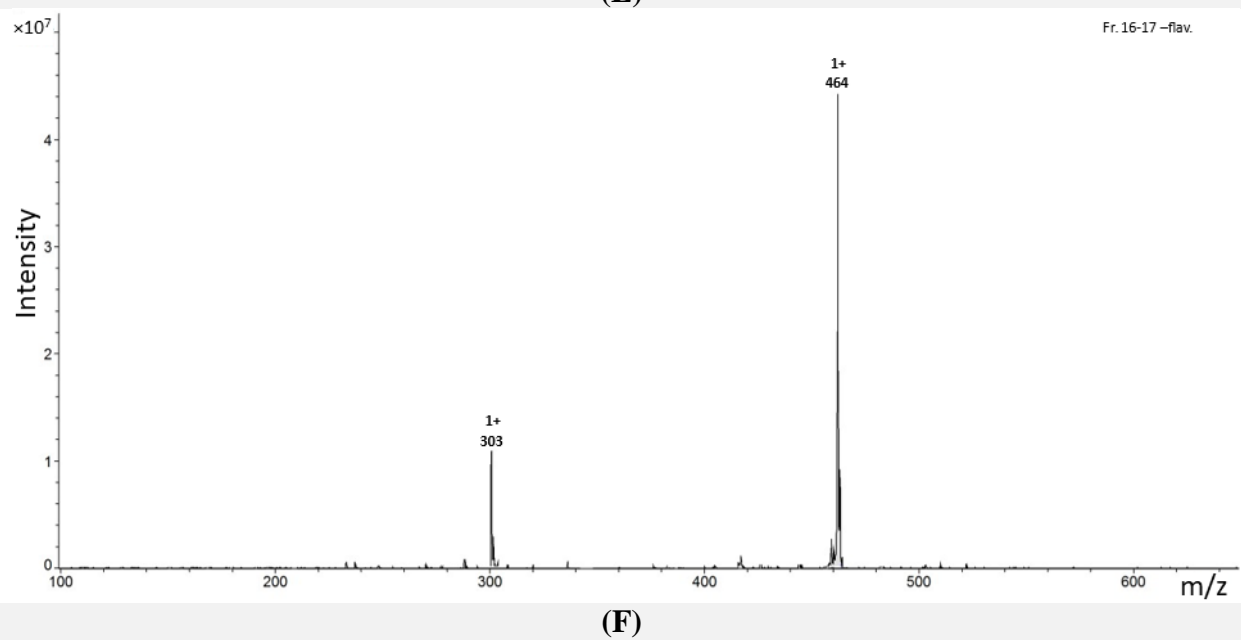

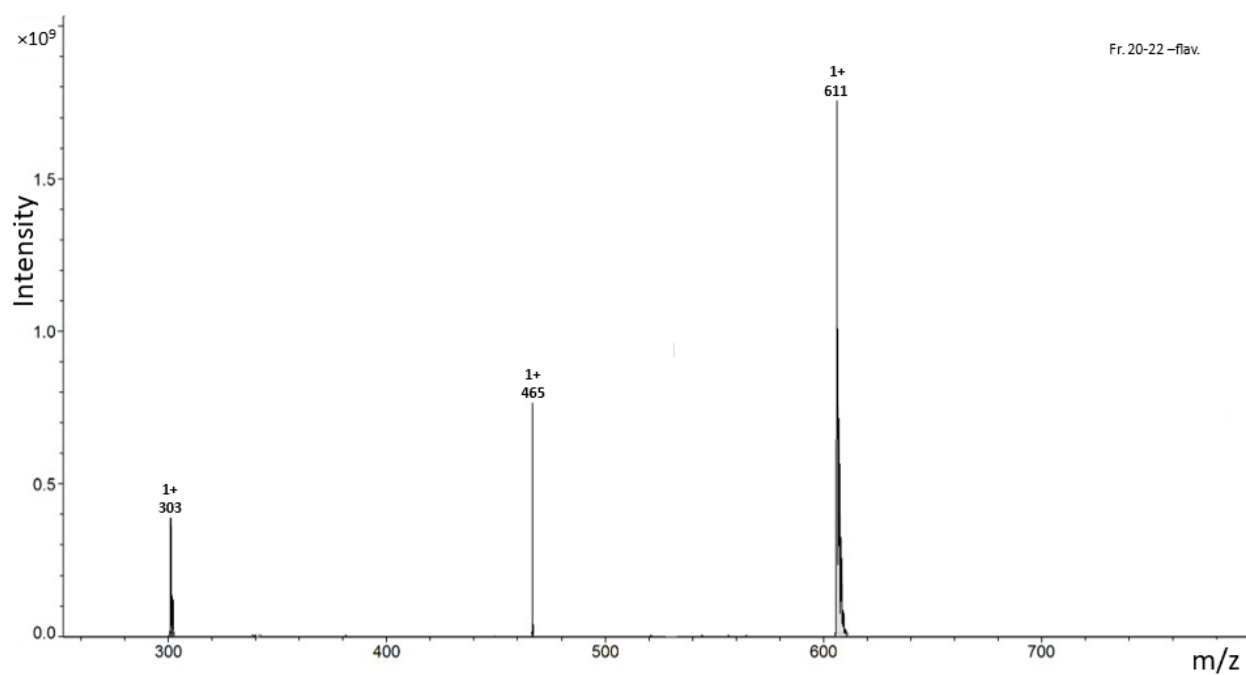

(G)

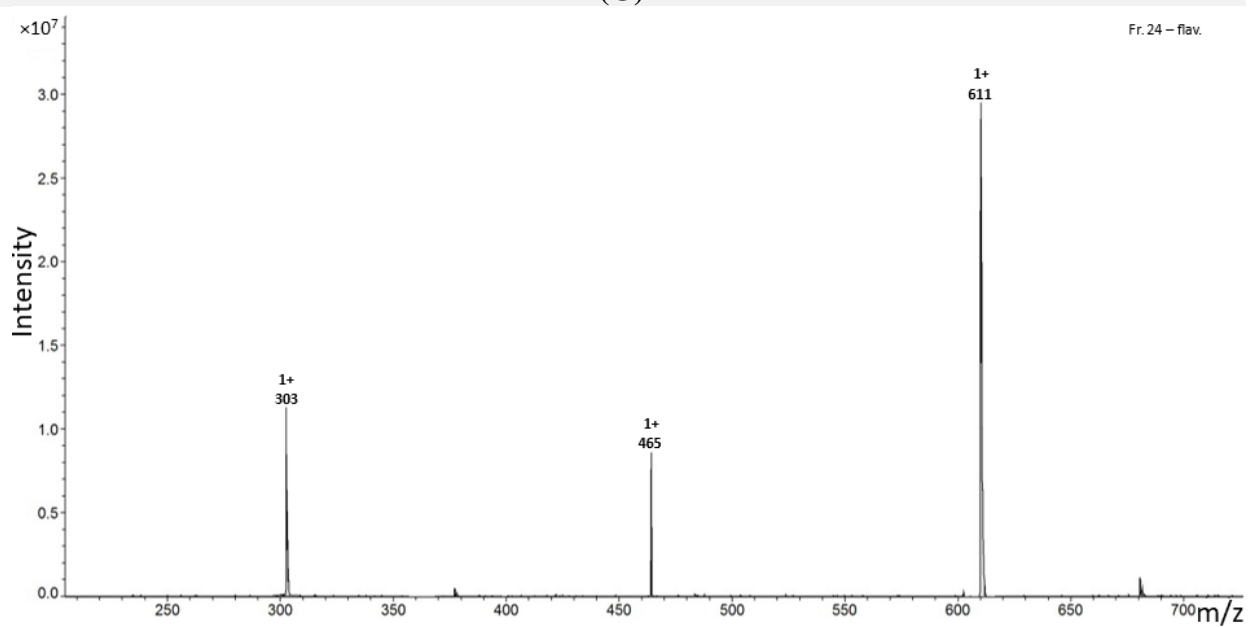

(H)



**Figure S3:** Values of spontaneous and zymosan-activated chemiluminescence of rat neutrophils: (A) chemiluminescence intensity ( $I_{\max}$ , c.u.), (B) the time showing peak CL ( $T_{\max}$ , s), C – slew rate of the chemiluminescence curve (Slope, c.u.). \*  $p < 0.05$ , significance of differences compared to the first day of the experiment, °  $p < 0.05$ , significance of differences between the animal groups.

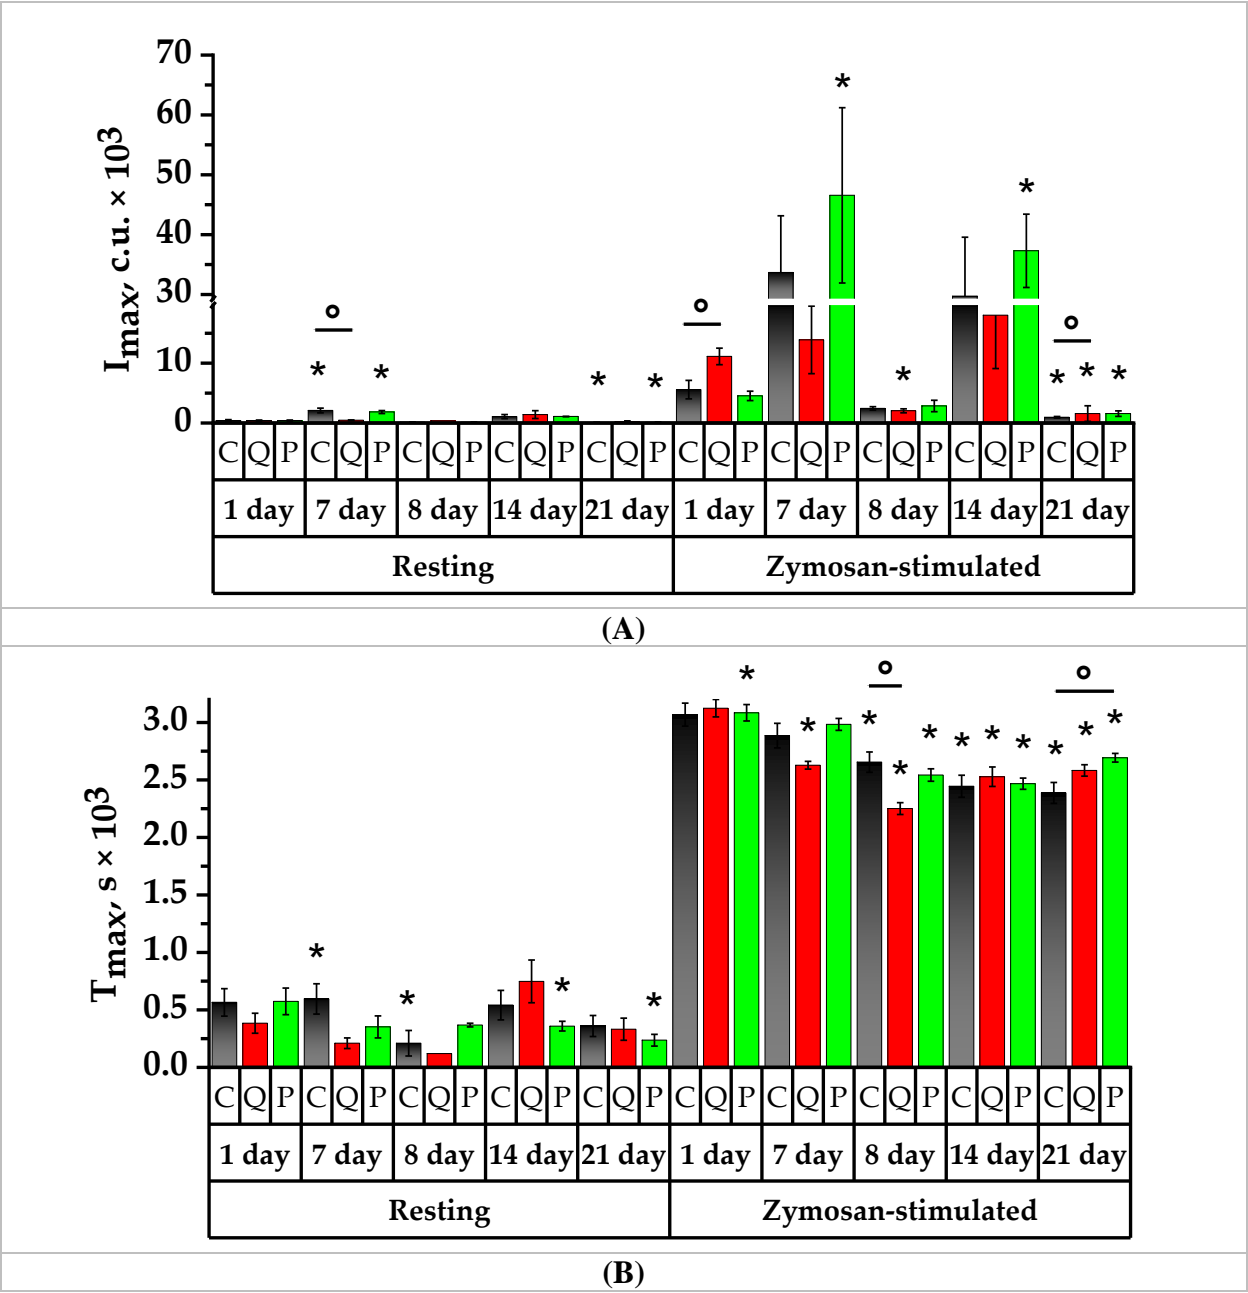

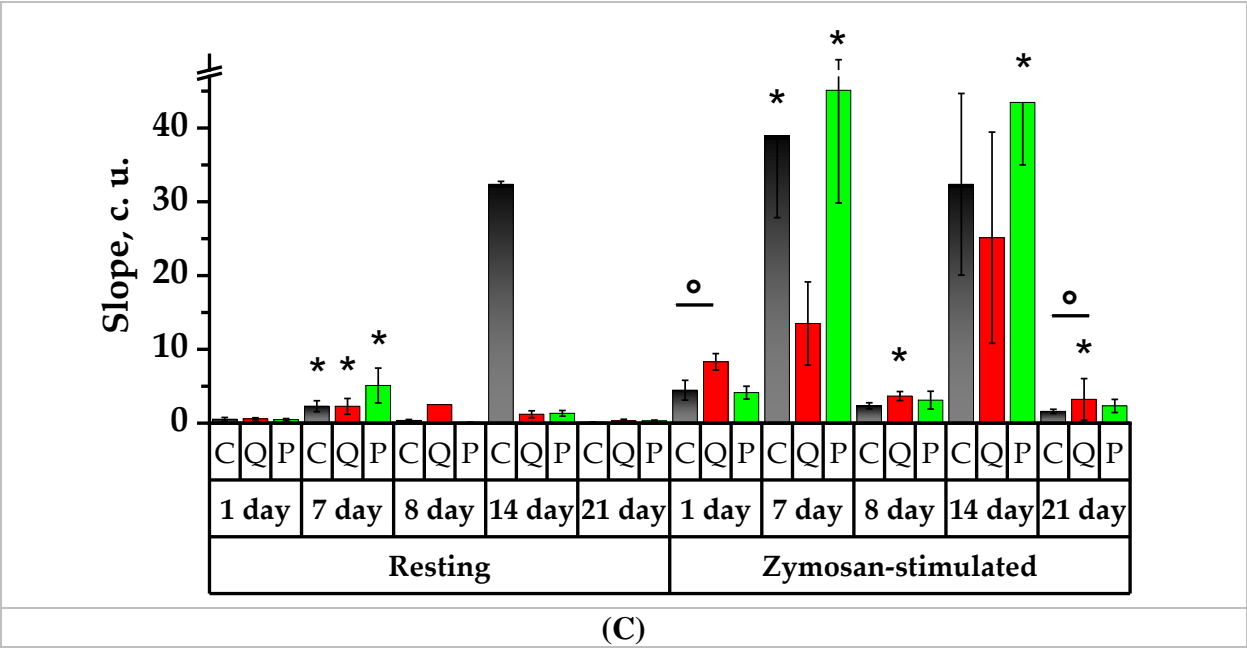

**Figure S4:** HPLC chromatograms of standard compounds. (A) Individual flavonols; (B) glycosidic form of flavonols.

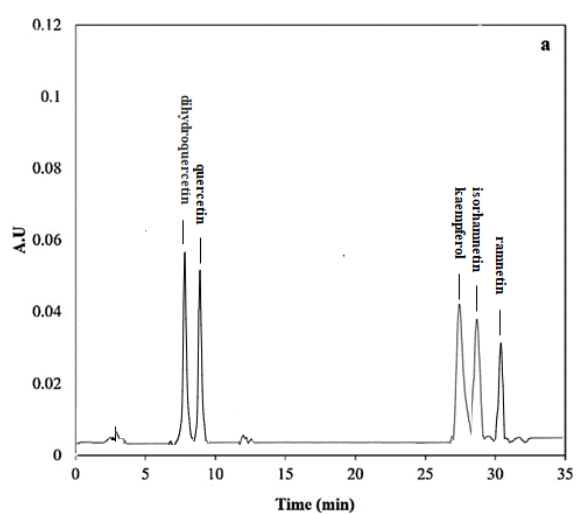

(A)

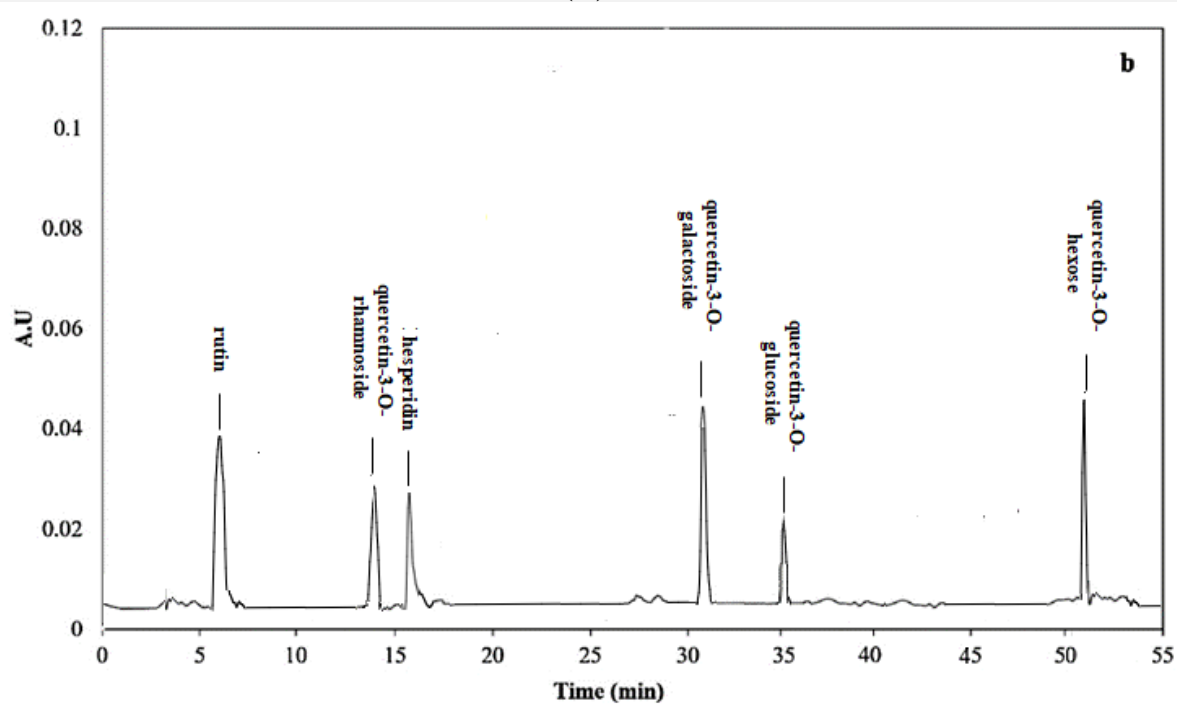

(B)
